# Supplementary material
Source: MDPI journal article supplement (https://www.mdpi.com/2073-4433/12/10/1363)
Supplement: s1 [file s1]

## Supplementary Material

### Response of Northern Populations of Black Spruce and Jack Pine to Southward Seed Transfers: Implications for Climate Change

John Pedlar, Dan McKenney, Pengxin Lu, Ashley Thomson

**Table S1.** Northern seed sources used in black spruce rangewide provenance study.

| Seed Source Identifier | Latitude (decimal degrees) | Longitude (decimal degrees) | Number of Test Sites | Average Height (m) | Average Survival (%) |
|------------------------|----------------------------|-----------------------------|----------------------|--------------------|----------------------|
| 2209                   | 60.17                      | -130.52                     | 2                    | 5.60               | 45.5                 |
| 4357                   | 62.93                      | -155.58                     | 1                    | 6.33               | 25.0                 |
| 4358                   | 62.12                      | -145.75                     | 2                    | 4.32               | 38.5                 |
| 4418                   | 64.98                      | -147.00                     | 1                    | 5.00               | 50.0                 |
| 4420                   | 64.73                      | -148.32                     | 2                    | 5.78               | 27.5                 |
| 4729                   | 67.00                      | -151.52                     | 1                    | 6.40               | 25.0                 |
| 6805                   | 53.42                      | -60.38                      | 13                   | 7.54               | 73.3                 |
| 6965                   | 52.48                      | -101.43                     | 7                    | 7.62               | 73.3                 |
| 6966                   | 52.38                      | -101.12                     | 9                    | 7.52               | 67.8                 |
| 6967                   | 55.50                      | -98.07                      | 7                    | 6.99               | 71.1                 |
| 6968                   | 54.58                      | -101.00                     | 5                    | 7.85               | 72.8                 |
| 6969                   | 54.87                      | -102.80                     | 8                    | 7.18               | 71.3                 |
| 6970                   | 56.05                      | -108.70                     | 6                    | 7.67               | 68.7                 |
| 6971                   | 54.72                      | -107.82                     | 5                    | 7.80               | 81.8                 |
| 6972                   | 53.23                      | -105.77                     | 5                    | 8.13               | 61.2                 |
| 6976                   | 57.00                      | -97.87                      | 3                    | 7.30               | 69.7                 |
| 6977                   | 57.63                      | -96.75                      | 4                    | 6.19               | 60.3                 |
| 6978                   | 52.38                      | -115.03                     | 3                    | 7.16               | 83.7                 |
| 6979                   | 52.37                      | -115.25                     | 8                    | 7.11               | 67.0                 |
| 6980                   | 52.50                      | -115.88                     | 2                    | 6.72               | 83.0                 |
| 6983                   | 55.03                      | -115.27                     | 5                    | 7.57               | 65.2                 |
| 6985                   | 56.60                      | -121.38                     | 2                    | 6.52               | 79.5                 |
| 6986                   | 56.62                      | -121.47                     | 5                    | 7.20               | 63.8                 |
| 6987                   | 58.78                      | -123.60                     | 2                    | 6.97               | 76.0                 |
| 6988                   | 58.73                      | -123.63                     | 2                    | 7.42               | 75.0                 |
| 6990                   | 59.92                      | -131.67                     | 1                    | 4.57               | 70.0                 |
| 6994                   | 60.53                      | -134.45                     | 2                    | 6.45               | 36.0                 |
| 6999                   | 60.05                      | -112.77                     | 2                    | 6.93               | 71.0                 |
| 7000                   | 63.57                      | -135.92                     | 7                    | 5.55               | 50.3                 |
| 7007                   | 64.73                      | -148.30                     | 3                    | 5.75               | 59.0                 |

**Table S2.** Northern seed sources used in jack pine rangewide provenance study.

| Seed Source Identifier | Latitude (decimal degrees) | Longitude (decimal degrees) | Number of Test Sites | Average Height (m) | Average Survival (%) |
|------------------------|----------------------------|-----------------------------|----------------------|--------------------|----------------------|
| 3253                   | 54.0333                    | -76.5167                    | 7                    | 14.81              | 9.7                  |
| 3285                   | 53.0500                    | -93.2500                    | 8                    | 13.94              | 41.0                 |
| 3287                   | 53.1167                    | -106.0667                   | 13                   | 14.20              | 37.4                 |
| 3288                   | 53.7500                    | -106.9667                   | 12                   | 13.28              | 30.9                 |
| 3289                   | 52.2000                    | -104.9167                   | 15                   | 13.21              | 30.4                 |
| 3290                   | 52.0500                    | -100.3833                   | 14                   | 13.56              | 36.2                 |
| 3291                   | 55.1167                    | -101.1500                   | 15                   | 12.80              | 24.8                 |
| 3292                   | 57.0833                    | -102.0250                   | 9                    | 13.71              | 13.5                 |

**Table S3.** Parameters from quadratic regression models between climate transfer distance and height/survival of northern seed sources used in rangewide provenance trials for black spruce. Bold values indicate statistical significance at  $p < 0.05$ .

| Species      | Seed Source Origin | Climate Variable* | Response Variable | N   | Intercept ( $\beta_0$ ) | slope 1 ( $\beta_1$ ) | slope 2 ( $\beta_2$ ) | R-squared |
|--------------|--------------------|-------------------|-------------------|-----|-------------------------|-----------------------|-----------------------|-----------|
| Black Spruce | Northern           | MAT               | Height            | 125 | <b>7.230</b>            | <b>0.14180</b>        | <b>-0.032500</b>      | 0.12      |
| Black Spruce | Northern           | MAT               | Survival          | 125 | <b>74.777</b>           | <b>-2.51790</b>       | -0.070200             | 0.21      |
| Black Spruce | Northern           | CMI               | Height            | 125 | <b>7.075</b>            | -0.00610              | 0.000070              | 0.01      |
| Black Spruce | Northern           | CMI               | Survival          | 125 | <b>70.618</b>           | 0.06200               | <b>-0.003600</b>      | 0.11      |
| Black Spruce | Northern           | ANNP              | Height            | 125 | <b>7.138</b>            | -0.00071              | 0.000001              | 0.01      |
| Black Spruce | Northern           | ANNP              | Survival          | 125 | <b>72.320</b>           | -0.01121              | -0.000015             | 0.13      |
| Black Spruce | Northern           | GSL               | Height            | 125 | <b>7.268</b>            | 0.01213               | <b>-0.000550</b>      | 0.09      |
| Black Spruce | Northern           | GSL               | Survival          | 125 | <b>74.565</b>           | <b>-0.42544</b>       | 0.000194              | 0.19      |
| Black Spruce | Central            | MAT               | Height            | 999 | <b>8.091</b>            | <b>0.22390</b>        | <b>-0.029600</b>      | 0.13      |
| Black Spruce | Central            | MAT               | Survival          | 999 | <b>66.688</b>           | 0.20833               | 0.117680              | 0.00      |
| Black Spruce | Central            | CMI               | Height            | 999 | <b>8.125</b>            | 0.00030               | <b>-0.000088</b>      | 0.00      |
| Black Spruce | Central            | CMI               | Survival          | 999 | <b>69.084</b>           | <b>-0.05567</b>       | <b>-0.001115</b>      | 0.02      |
| Black Spruce | Central            | ANNP              | Height            | 999 | <b>8.081</b>            | <b>0.00065</b>        | <b>-0.000001</b>      | 0.02      |
| Black Spruce | Central            | ANNP              | Survival          | 999 | <b>69.090</b>           | <b>-0.00531</b>       | <b>-0.000014</b>      | 0.02      |
| Black Spruce | Central            | GSL               | Height            | 999 | <b>8.178</b>            | <b>0.02404</b>        | <b>-0.000464</b>      | 0.11      |
| Black Spruce | Central            | GSL               | Survival          | 999 | <b>67.533</b>           | <b>0.12512</b>        | -0.000601             | 0.02      |
| Black Spruce | Southern           | MAT               | Height            | 221 | <b>8.940</b>            | 0.10240               | <b>-0.052800</b>      | 0.26      |
| Black Spruce | Southern           | MAT               | Survival          | 221 | <b>69.387</b>           | <b>3.75430</b>        | 0.137400              | 0.12      |
| Black Spruce | Southern           | CMI               | Height            | 221 | <b>8.392</b>            | -0.00046              | -0.000086             | 0.00      |
| Black Spruce | Southern           | CMI               | Survival          | 221 | <b>66.464</b>           | <b>-0.06715</b>       | <b>-0.001954</b>      | 0.05      |
| Black Spruce | Southern           | ANNP              | Height            | 221 | <b>8.404</b>            | 0.00049               | <b>-0.000002</b>      | 0.02      |
| Black Spruce | Southern           | ANNP              | Survival          | 221 | <b>64.990</b>           | -0.00524              | <b>-0.000019</b>      | 0.02      |
| Black Spruce | Southern           | GSL               | Height            | 221 | <b>8.907</b>            | 0.00981               | <b>-0.000742</b>      | 0.20      |
| Black Spruce | Southern           | GSL               | Survival          | 221 | <b>68.717</b>           | <b>0.25604</b>        | -0.002252             | 0.10      |

\*MAT=Mean Annual Temperature; CMI = Climate Moisture Index; ANNP=Annual Precipitation; and GSL=Growing Season Length.

**Table S4.** Parameters from quadratic regression models between climate transfer distance and height/survival of northern seed sources used in rangewide provenance trials for jack pine. Bold values indicate statistical significance at  $p < 0.05$ .

| Species   | Seed Source Origin | Climate Variable | Response Variable | N   | Intercept ( $\beta_0$ ) | slope 1 ( $\beta_1$ ) | slope 2 ( $\beta_2$ ) | R-squared |
|-----------|--------------------|------------------|-------------------|-----|-------------------------|-----------------------|-----------------------|-----------|
| Jack Pine | Northern           | MAT              | Height            | 86  | <b>13.327</b>           | <b>0.55380</b>        | <b>-0.077800</b>      | 0.17      |
| Jack Pine | Northern           | MAT              | Survival          | 93  | <b>40.413</b>           | <b>-4.07980</b>       | 0.147300              | 0.19      |
| Jack Pine | Northern           | CMI              | Height            | 86  | <b>14.196</b>           | 0.00460               | -0.000500             | 0.06      |
| Jack Pine | Northern           | CMI              | Survival          | 93  | <b>21.809</b>           | <b>0.50380</b>        | <b>-0.005100</b>      | 0.11      |
| Jack Pine | Northern           | ANNP             | Height            | 86  | <b>13.410</b>           | 0.00836               | <b>-0.000018</b>      | 0.15      |
| Jack Pine | Northern           | ANNP             | Survival          | 93  | <b>20.520</b>           | 0.04508               | -0.000049             | 0.01      |
| Jack Pine | Northern           | GSL              | Height            | 86  | <b>13.509</b>           | <b>0.08187</b>        | <b>-0.001730</b>      | 0.23      |
| Jack Pine | Northern           | GSL              | Survival          | 93  | <b>35.742</b>           | <b>-0.48562</b>       | 0.003183              | 0.11      |
| Jack Pine | Central            | MAT              | Height            | 541 | <b>15.108</b>           | <b>0.14866</b>        | <b>-0.079611</b>      | 0.12      |
| Jack Pine | Central            | MAT              | Survival          | 548 | <b>47.940</b>           | 0.59644               | -0.039450             | 0.01      |
| Jack Pine | Central            | CMI              | Height            | 541 | <b>14.900</b>           | <b>-0.01827</b>       | <b>-0.000575</b>      | 0.09      |
| Jack Pine | Central            | CMI              | Survival          | 548 | <b>52.301</b>           | -0.03323              | <b>-0.003969</b>      | 0.14      |
| Jack Pine | Central            | ANNP             | Height            | 541 | <b>14.960</b>           | <b>-0.00281</b>       | <b>-0.000010</b>      | 0.11      |
| Jack Pine | Central            | ANNP             | Survival          | 548 | <b>51.780</b>           | 0.00019               | <b>-0.000053</b>      | 0.10      |
| Jack Pine | Central            | GSL              | Height            | 541 | <b>15.076</b>           | <b>0.03251</b>        | <b>-0.001412</b>      | 0.14      |
| Jack Pine | Central            | GSL              | Survival          | 548 | <b>47.836</b>           | <b>0.12761</b>        | -0.000893             | 0.01      |
| Jack Pine | Southern           | MAT              | Height            | 386 | <b>14.951</b>           | <b>-0.15910</b>       | <b>-0.067910</b>      | 0.04      |
| Jack Pine | Southern           | MAT              | Survival          | 394 | <b>50.057</b>           | <b>3.75510</b>        | <b>-0.247800</b>      | 0.25      |
| Jack Pine | Southern           | CMI              | Height            | 386 | <b>15.063</b>           | <b>-0.02220</b>       | <b>-0.000793</b>      | 0.07      |
| Jack Pine | Southern           | CMI              | Survival          | 394 | <b>41.247</b>           | -0.06841              | <b>-0.005467</b>      | 0.05      |
| Jack Pine | Southern           | ANNP             | Height            | 386 | <b>14.960</b>           | <b>-0.00567</b>       | <b>-0.000018</b>      | 0.12      |
| Jack Pine | Southern           | ANNP             | Survival          | 394 | <b>40.270</b>           | 0.00551               | <b>-0.000056</b>      | 0.05      |
| Jack Pine | Southern           | GSL              | Height            | 386 | <b>15.037</b>           | -0.00879              | <b>-0.000836</b>      | 0.04      |
| Jack Pine | Southern           | GSL              | Survival          | 394 | <b>46.524</b>           | <b>0.42419</b>        | -0.000967             | 0.17      |

\*MAT=Mean Annual Temperature; CMI = Climate Moisture Index; ANNP=Annual Precipitation; and GSL=Growing Season Length.

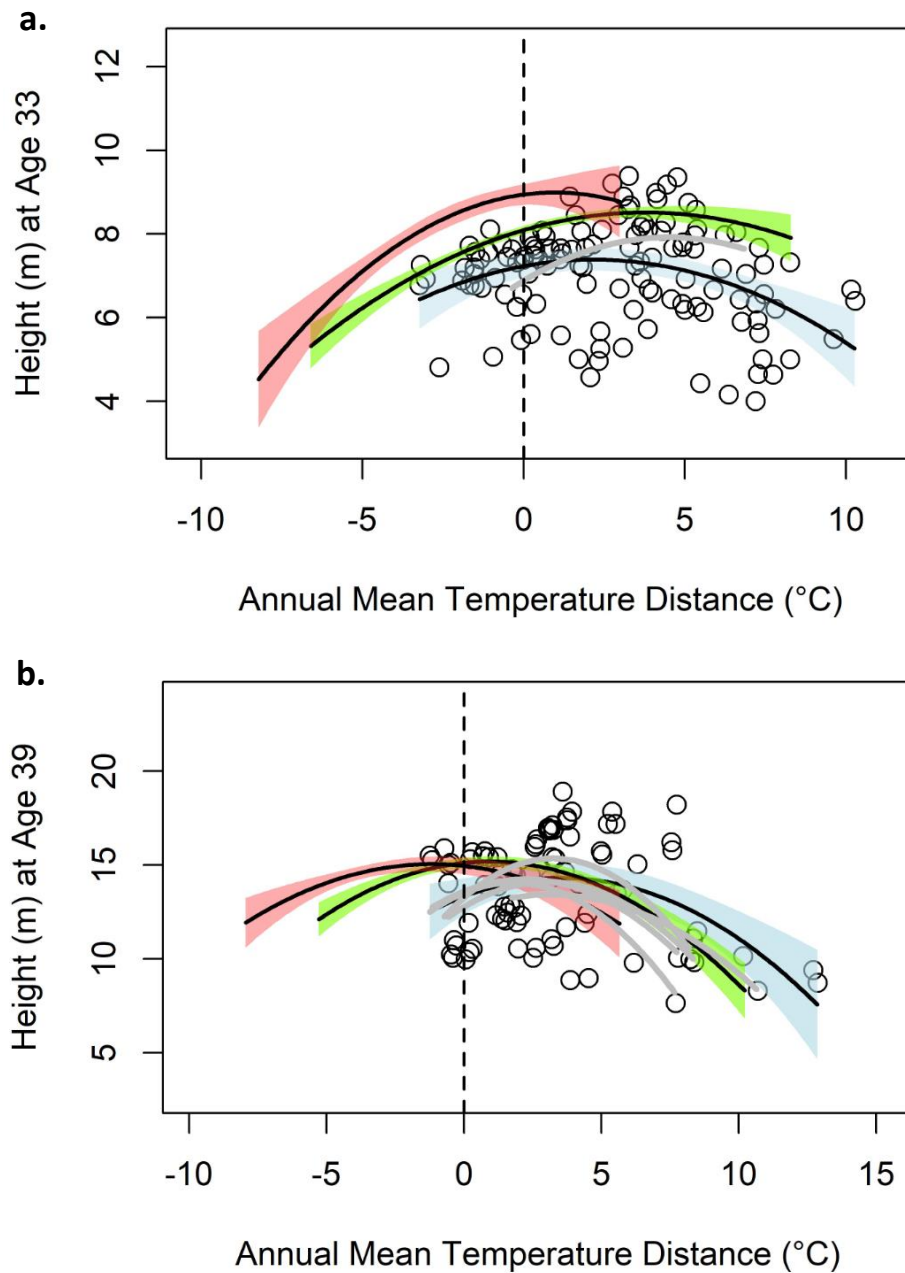

**Figure S1.** Relationship between mean annual temperature and height growth for a) black spruce and b) jack pine. Separate regression lines and 95 % confidence intervals are shown for southern (red), central (green), and northern (blue) seed sources. Gray regression lines are for individual northern seed sources that had more than 10 data points associated with them. Data points (black circles) are shown only for northern seed sources. The vertical dashed line indicates local deployment of seed sources (i.e., a transfer distance of zero); points to the right of this line indicate seed transfers to warmer planting sites and vice versa.

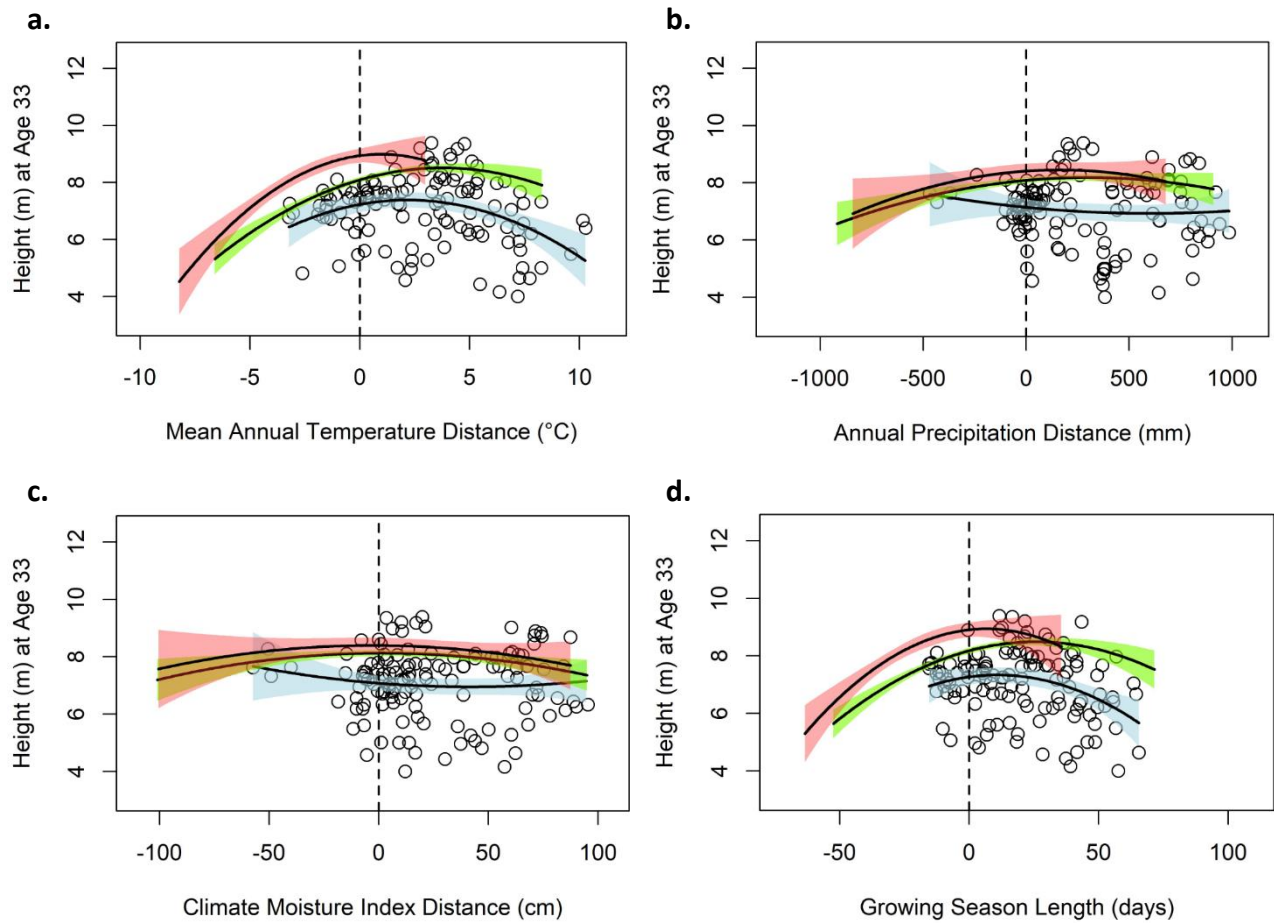

**Figure S2.** Relationship between black spruce height growth and climate transfer distance of a) mean annual temperature, b) annual precipitation c) climate moisture index, and d) growing season length. Separate regression lines and 95 % confidence intervals are shown for southern (red), central (green), and northern (blue) seed sources. Data points (black circles) are shown only for northern seed sources. The vertical dashed line indicates local deployment of seed sources (i.e., a transfer distance of zero); points to the right of this line indicate seed transfers to warmer planting sites and vice versa.

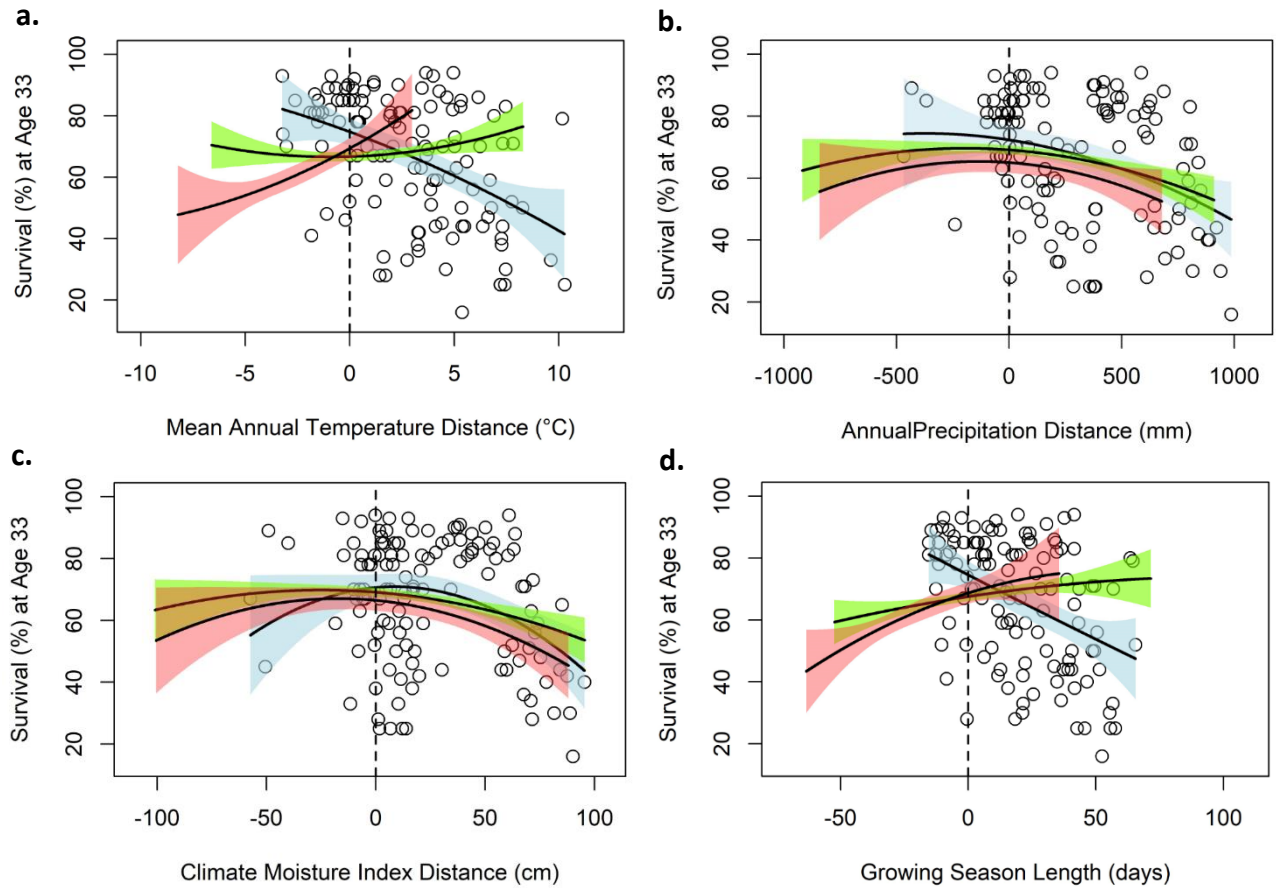

**Figure S3.** Relationship between black spruce survival and climate transfer distance of a) mean annual temperature, b) annual precipitation c) climate moisture index, and d) growing season length. Separate regression lines and 95 % confidence intervals are shown for southern (red), central (green), and northern (blue) seed sources. Data points (black circles) are shown only for northern seed sources. The vertical dashed line indicates local deployment of seed sources (i.e., a transfer distance of zero); points to the right of this line indicate seed transfers to warmer planting sites and vice versa.

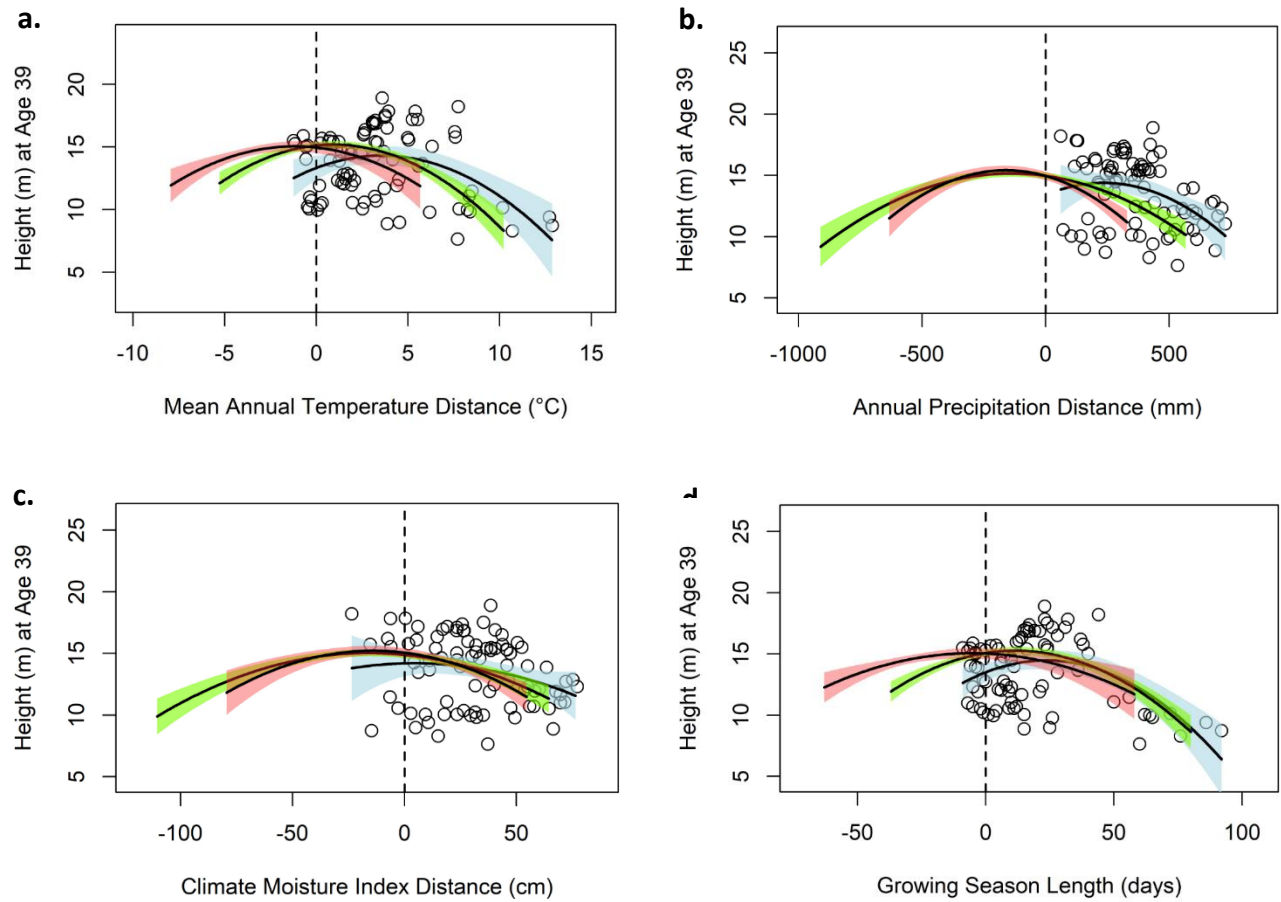

**Figure S4.** Relationship between jack pine height growth and climate transfer distance of a) mean annual temperature, b) annual precipitation c) climate moisture index, and d) growing season length. Separate regression lines and 95 % confidence intervals are shown for southern (red), central (green), and northern (blue) seed sources. Data points (black circles) are shown only for northern seed sources. The vertical dashed line indicates local deployment of seed sources (i.e., a transfer distance of zero); points to the right of this line indicate seed transfers to warmer planting sites and vice versa.



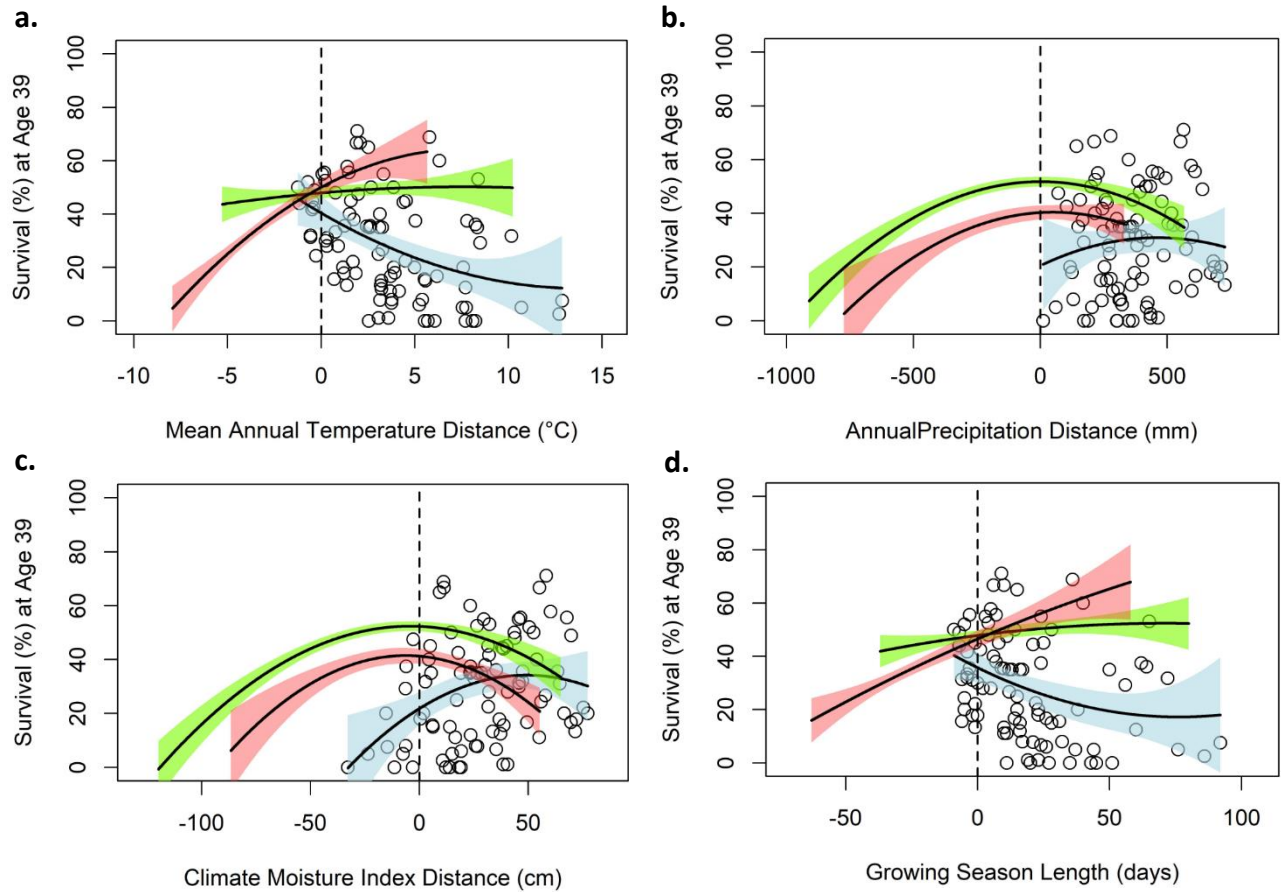

**Figure S5.** Relationship between Jack pine survival and climate transfer distance of a) mean annual temperature, b) annual precipitation c) climate moisture index, and d) growing season length. Separate regression lines and 95 % confidence intervals are shown for southern (red), central (green), and northern (blue) seed sources. Data points (black circles) are shown only for northern seed sources. The vertical dashed line indicates local deployment of seed sources (i.e., a transfer distance of zero); points to the right of this line indicate seed transfers to warmer planting sites and vice versa.
